# Supplementary material
Source: PubMed Central journal article supplement (PMC10400108)
Supplement: jasn-34-1381-s007.pdf [file jasn-34-1381-s007.pdf]

## **Supplemental Figures and Legends:**

### **Supplemental Figure 1. Dicer-deficiency reduces inflammation and fibrosis in cold-storage**

**transplantation kidneys.** The left kidney was collected from Dicer-knockout (KO) or wild-type (WT) mice for 10 hours of cold storage, followed by transplantation into wild-type mice for 7 or 14 days (CST7d, CST14d). The right kidney of donor mice without cold storage transplantation was used as sham control (Sham). **(A)** Representative images of macrophage immunohistochemistry. Scale bar=100 $\mu$ m. **(B)** Representative images of C3 staining. Scale bar=100 $\mu$ m. **(C)** Representative images of  $\alpha$ -SMA staining. Scale bar=100 $\mu$ m. **(D)** Representative images of Sirius Red staining. Scale bar=100 $\mu$ m. **(E)** Quantitative analysis of macrophage positive area. **(F)** Quantitative analysis of C3 positive signal. **(G)** Quantitative analysis of  $\alpha$ -SMA positive area. **(H)** Quantitative analysis of Sirius Red positive area. Data are expressed as mean $\pm$ SD (n=4-5). \*, P<0.05 versus sham control; #, P<0.05 versus WT transplant.

### **Supplemental Figure 2. Taqman real-time PCR analysis of microRNA expression in cold-storage transplantation kidneys**

Transplanted kidneys were collected at 1, 7 and 14 days after cold-storage transplantation to isolate RNAs for Taqman real-time PCR analysis of miR-132, miR-874 and miR-185. The right kidney of the donor mice that did not experience cold-storage transplantation was used as sham control for normalization. Data are expressed as mean  $\pm$  SD (n=5); \*, P<0.05 versus respective sham control group.

### **Supplemental Figure 3. Overexpression of NDUFA4 suppresses miR-147-induced mitochondrial dysfunction and cell death.**

RPTCs with NDUFA4-pcDNA3.1 or empty pcDNA3.1 were transfected with miR-147 mimic or

negative control (NC) oligo. **(A)** Representative cell morphology. Scale bar=100  $\mu\text{m}$ . **(B)** The percentage of apoptosis evaluated morphologically. **(C)** Measurement of oxygen consumption rate (OCR) using an XF24 Extracellular Flux Analyzer **(D)** Flow cytometry analysis of mitochondrial membrane potential after JC-1 staining. **(E)** Cellular ATP. Quantitative data are expressed as mean $\pm$ SD (n=4-10); \*, P<0.05 versus respective NC group; #, P<0.05 versus miR-147 mimic group with pcDNA 3.1.

# Supplemental figure 1. Dicer-deficiency reduces inflammation and fibrosis in cold-storage transplantation kidneys

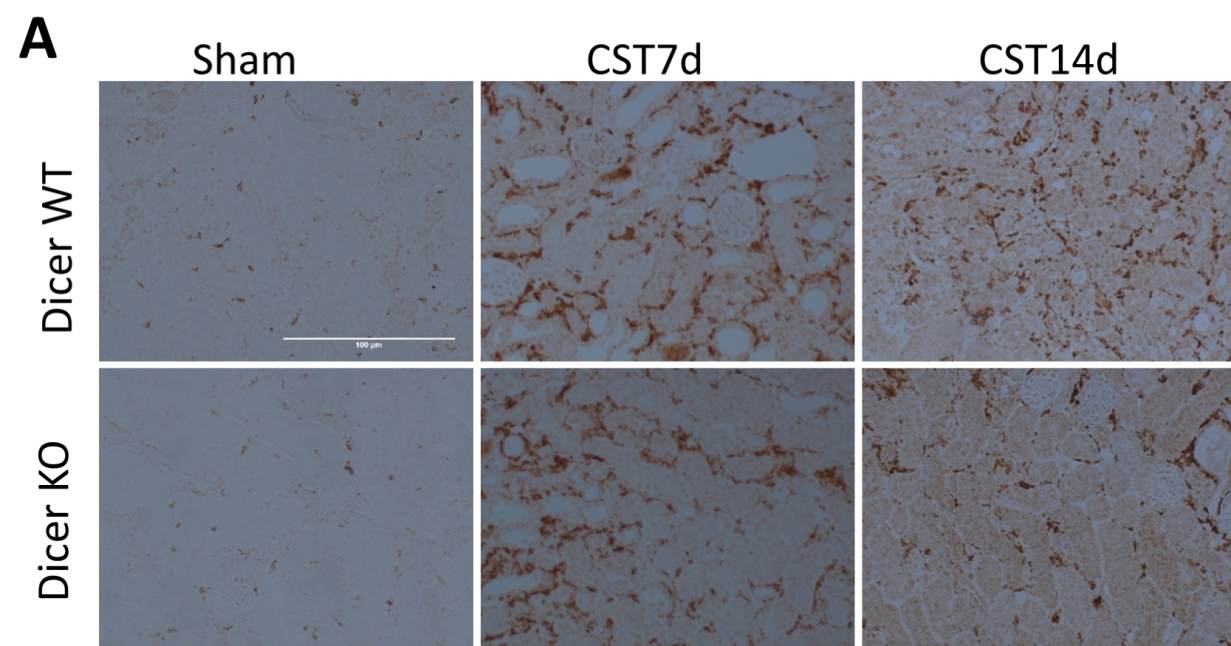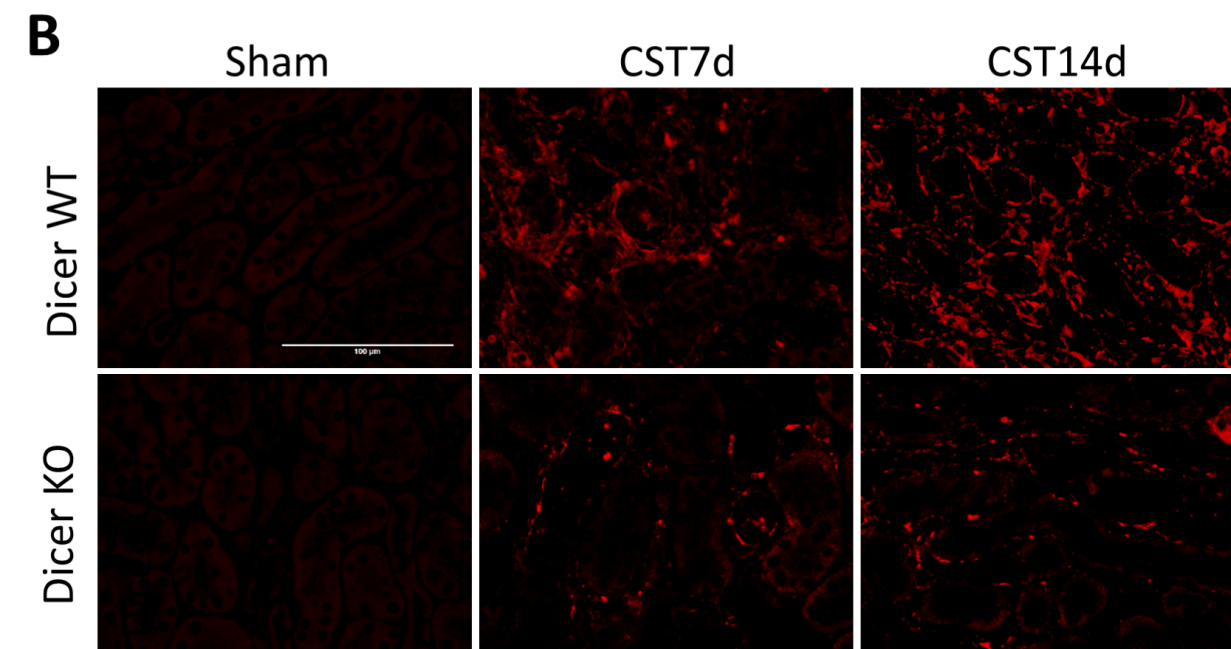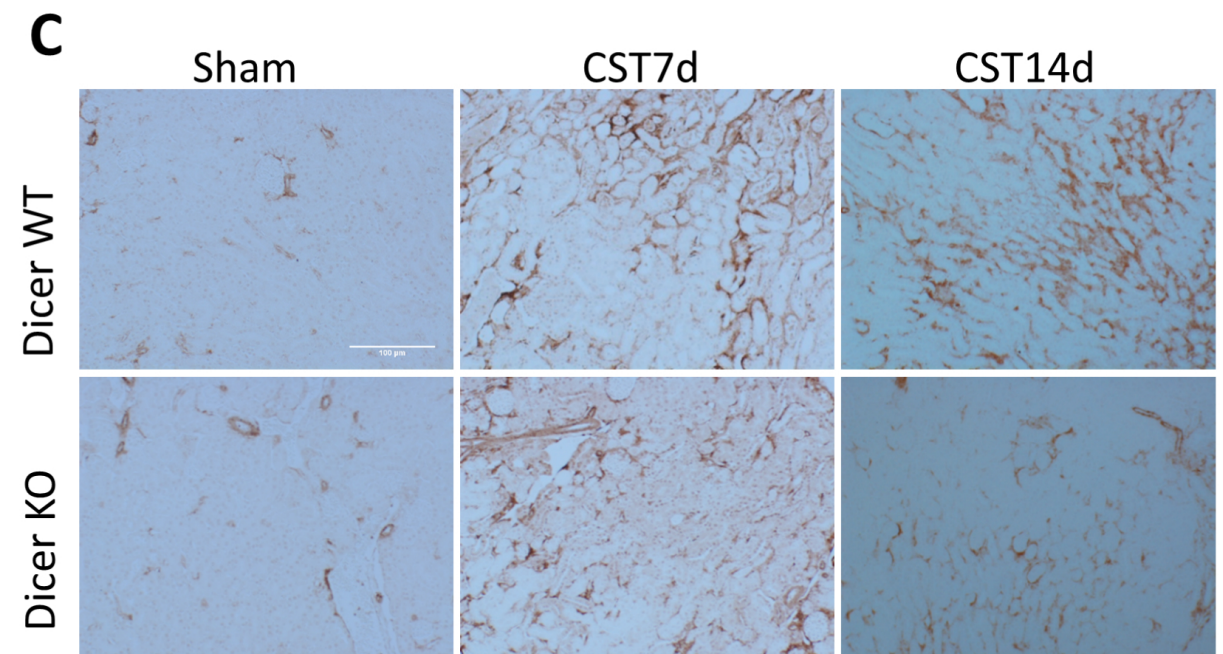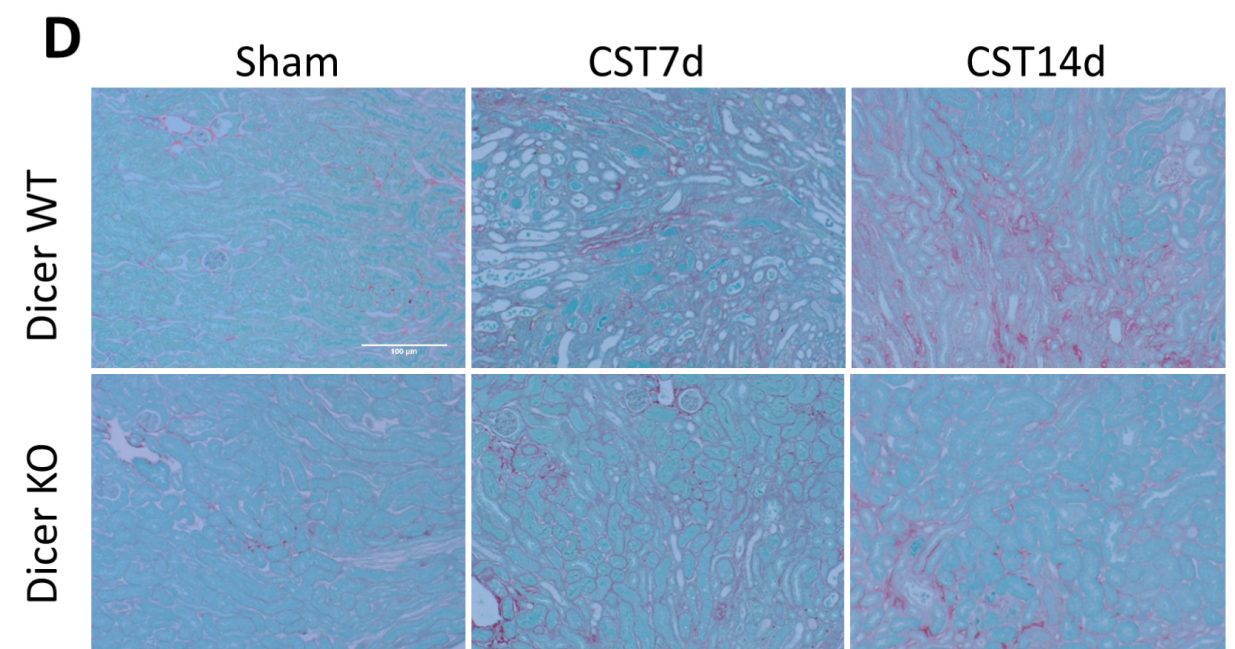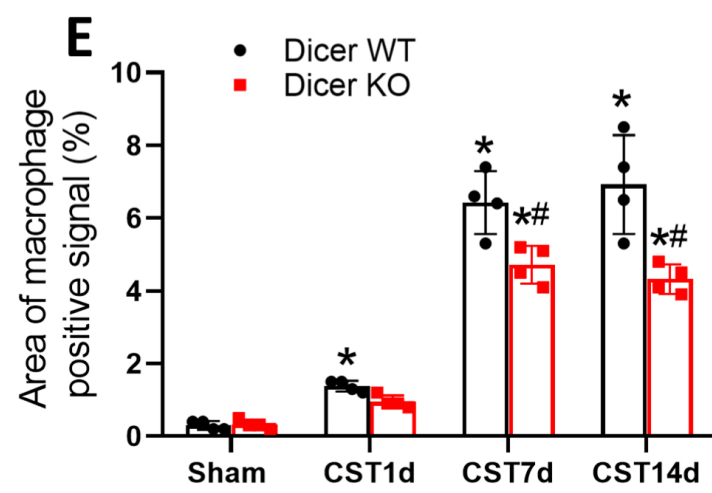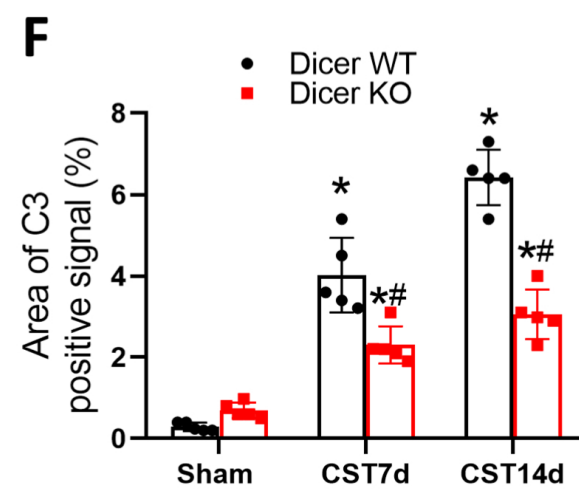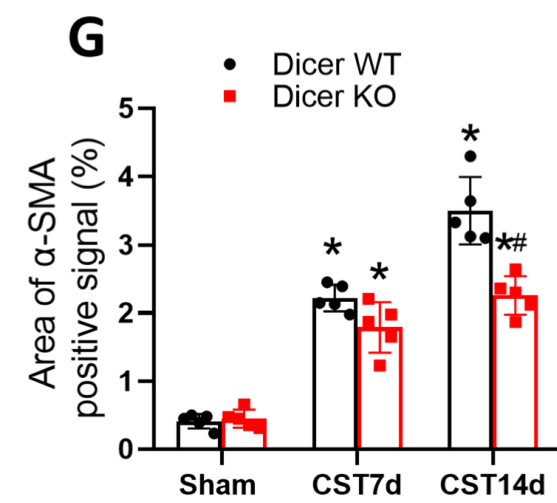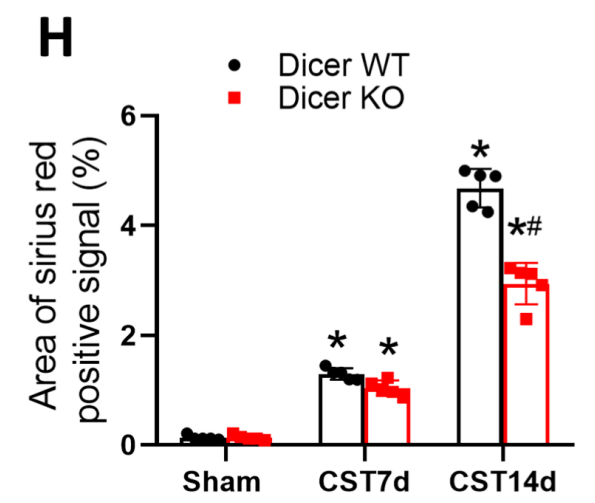

Supplemental Figure 2. Taqman real-time PCR analysis of microRNA expression in cold-storage transplantation kidneys

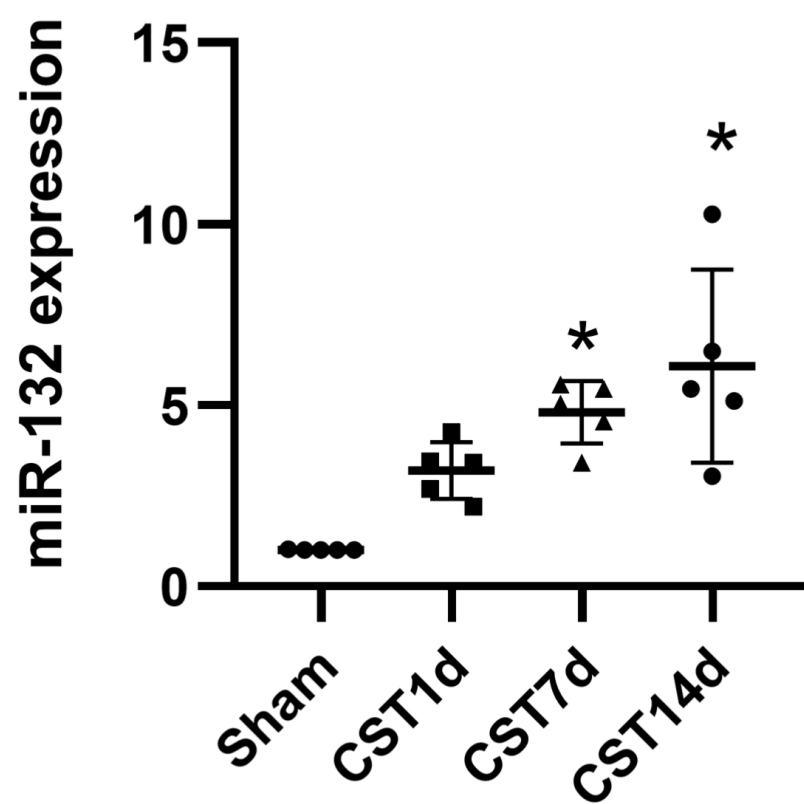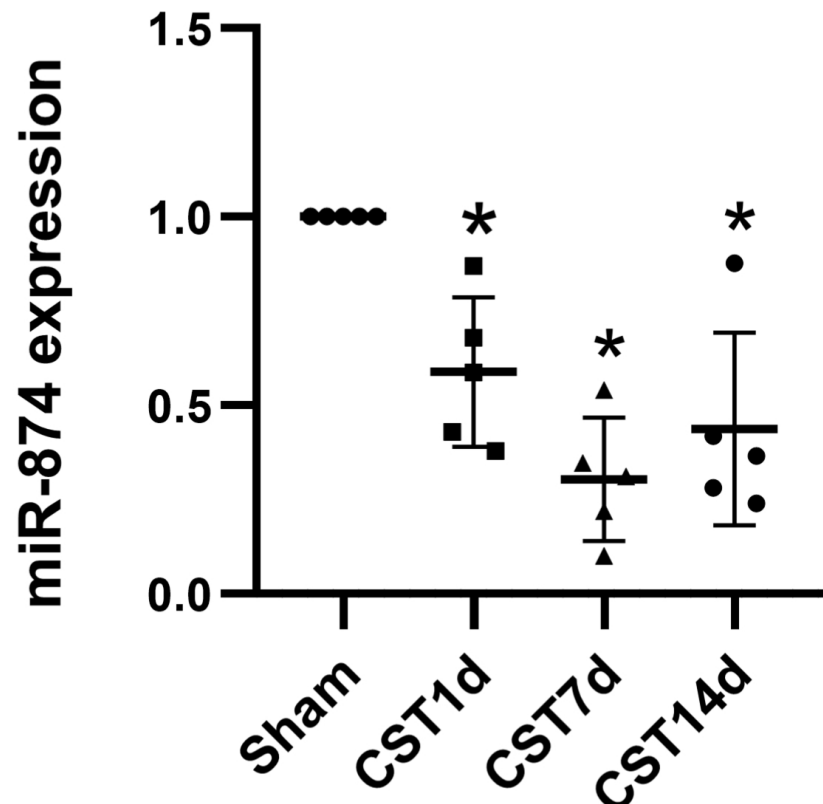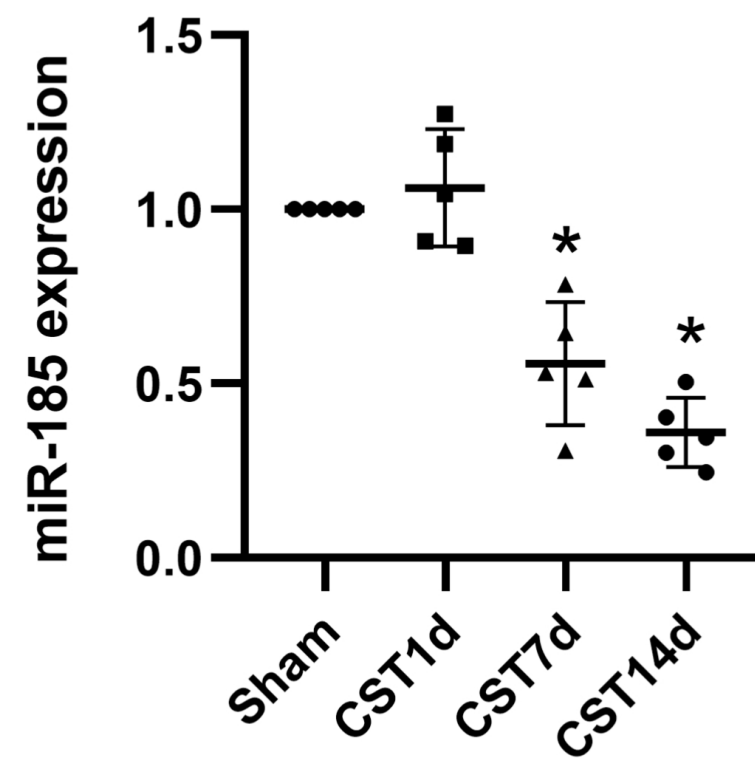



**Supplemental Figure 3. Overexpression of NDUFA4 suppresses miR-147-induced mitochondrial dysfunction and cell death.**

**A**

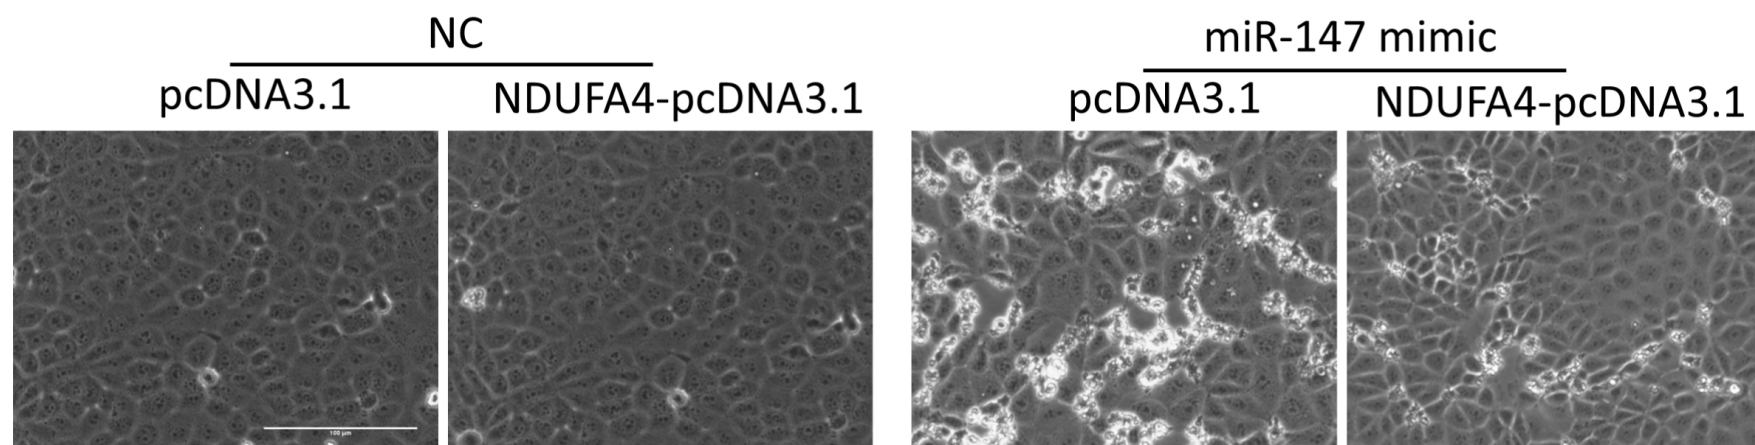

**B**

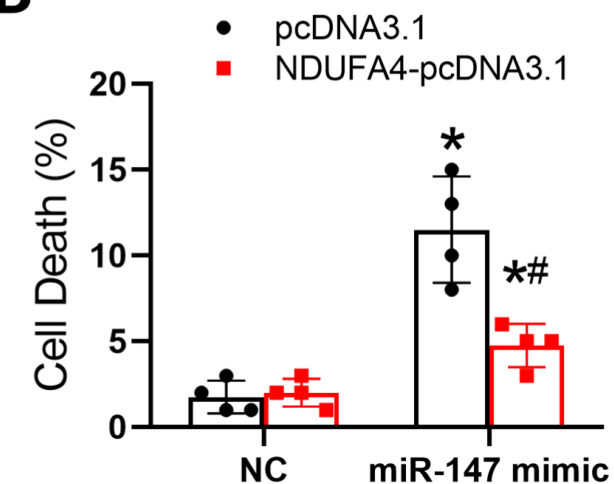

**C**

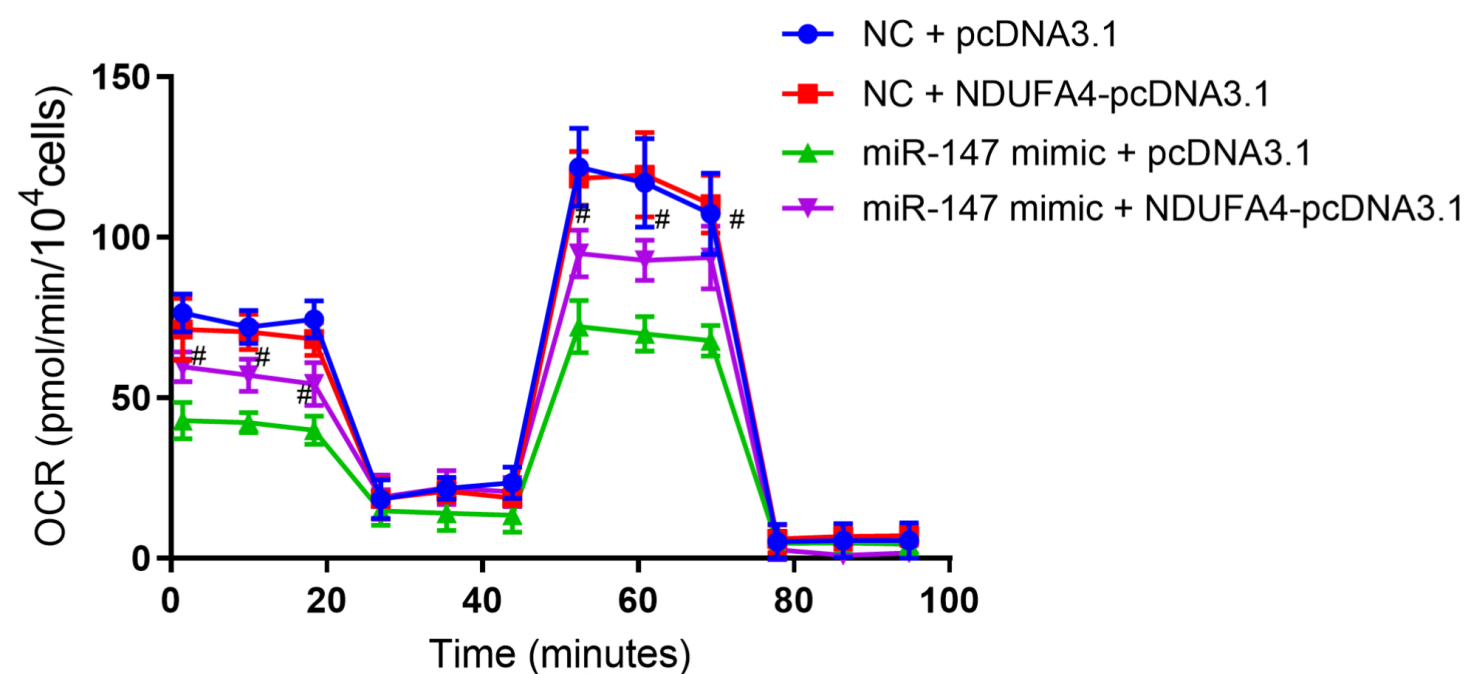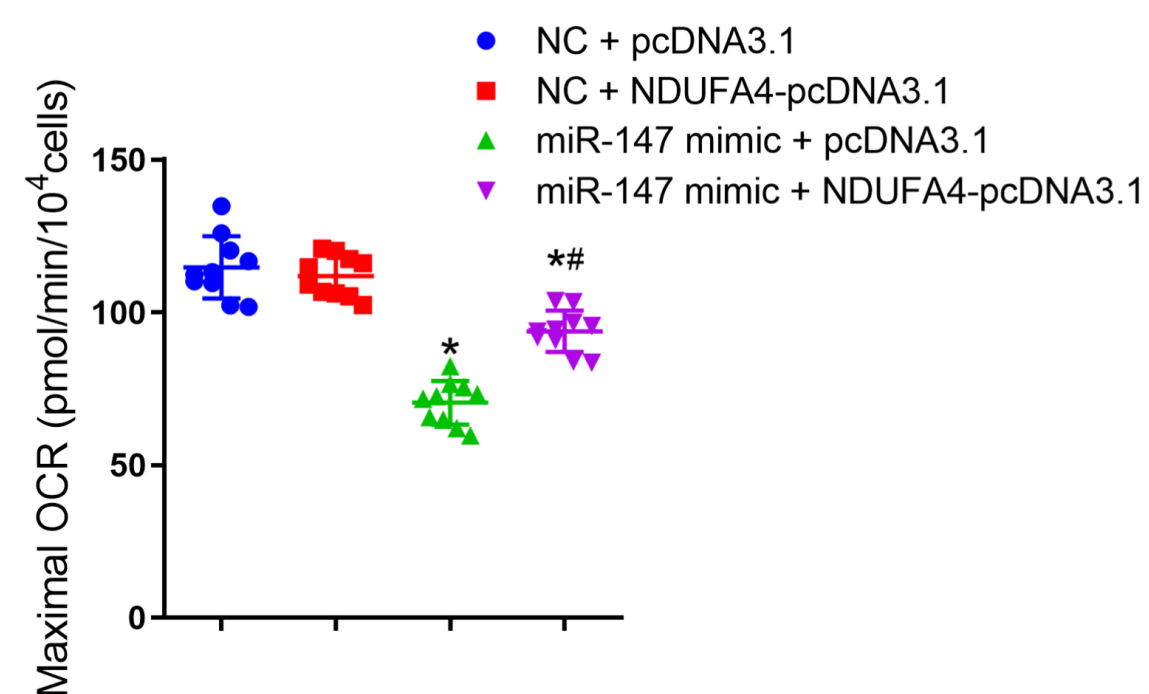

**D**

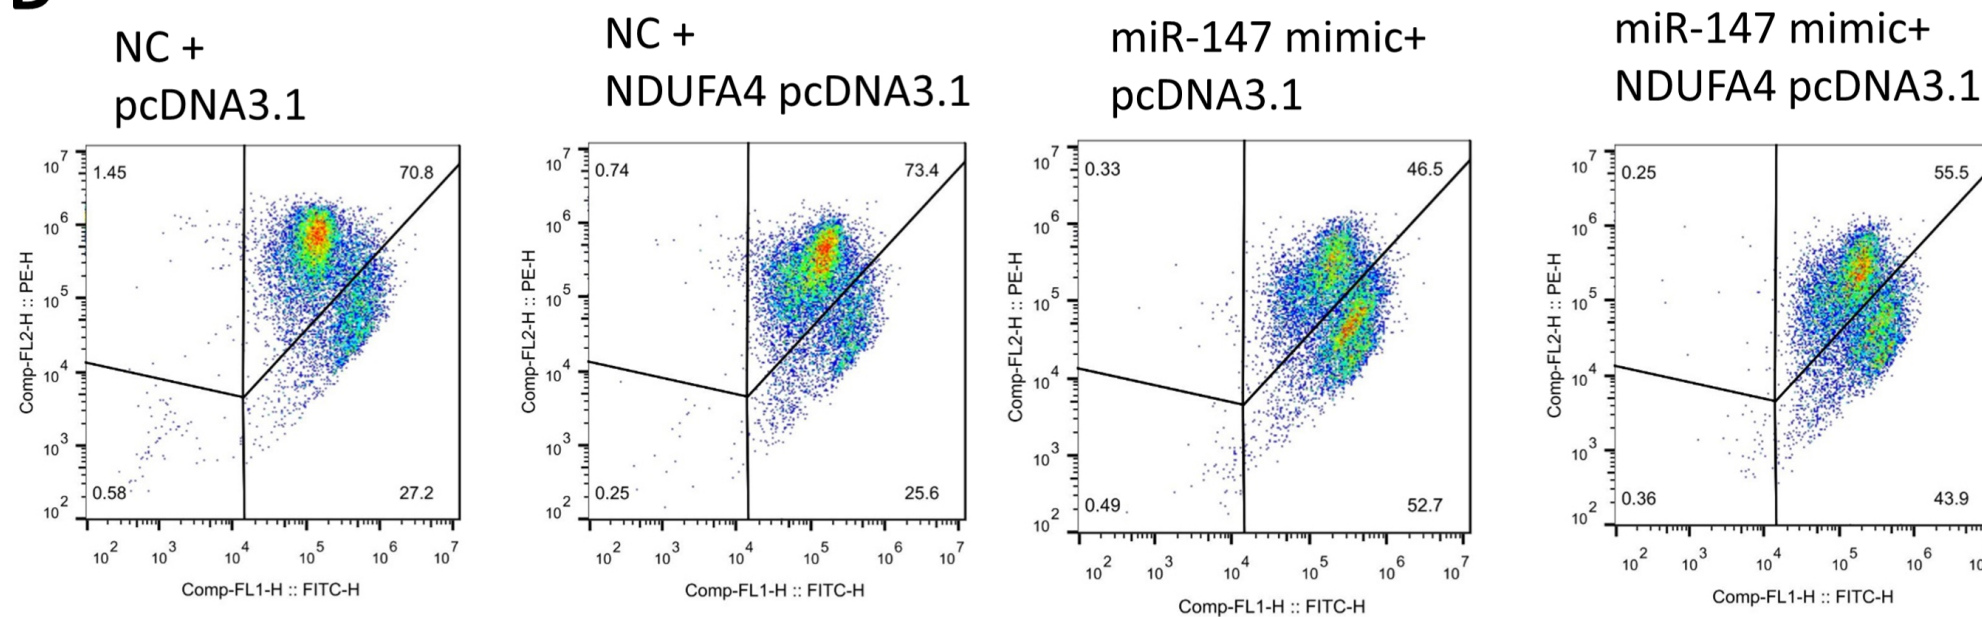

**E**

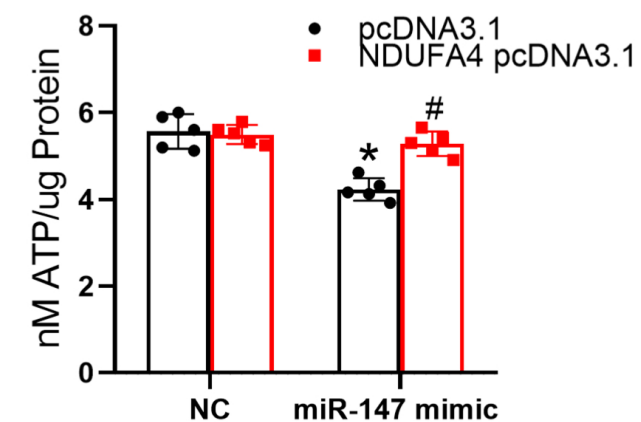

**TABLE 1. CLINICAL DATA OF DGF AND NON-DGF PATIENTS EXAMINED**

| <b>PARAMETER</b>                           | <b>DGF (n=5)</b>           | <b>Control (n=5)</b>     | <b>P Value</b> |
|--------------------------------------------|----------------------------|--------------------------|----------------|
| <b>Donor information</b>                   |                            |                          |                |
| Donor age, (year)                          | 48.8 ± 7.28                | /                        |                |
| Donor Sex, F/M                             | M (4) F (1)                | /                        |                |
| Donor source, living/deceased              | Deceased                   | /                        |                |
| Donor last creatinine, mg/dL               | 1.0 ± 0.14                 | /                        |                |
| Donor last BUN mg/dl                       | 19.40 ± 1.38               |                          |                |
| <b>Clinical indexes</b>                    |                            |                          |                |
| Sex                                        | M (4) F (1)                | M (4) F (1)              |                |
| Age (year)                                 | 39.6 ±9.44                 | 50.6±10.48               | 0.1251         |
| Hypertension                               | 80%                        | 20%                      |                |
| Hypertension                               | All negative               | All negative             |                |
| Diabetes                                   | Chronic glomerulonephritis | /                        |                |
| Primary cause for ESRD                     | DGF(5)                     | para-cancer renal tissue |                |
| Diagnosis                                  | 10 (6; 14)                 | during surgery           |                |
| Time of Biopsy, days after transplantation |                            |                          |                |
| <b>Immunosuppression</b>                   |                            |                          |                |
| Calcineurin inhibitors                     | 100%                       | 0%                       |                |
| Mycophenolic acid                          | 100%                       | 0%                       |                |
| mTOR inhibitors                            | 20%                        | 0%                       |                |
| Steroids                                   | 100%                       | 0%                       |                |
| <b>Laboratory data</b>                     |                            |                          |                |
| BUN (mg/dl)*                               | 55.44 ± 20.37              | 13.93 ± 2.52             | 0.0001*        |
| Creatinine (mg/dl)*                        | 4.57 ± 0.98                | 0.76 ± 0.09              | 0.0006*        |

(2-tailed student's t-test for comparison). \*, statistically significant difference between DGF and non-DGF group.
